# Supplementary material
Source: publisher site journal article supplement (https://www.dovepress.com/article/461450)
Supplement: Supplementary file 1 [file get_supplementary_file.php]

**Supplement Figure 1:** The absolute standardized mean difference values (maximum pairwise) of variables in 4 treatment groups (GTR no-PORT group, GTR with PORT group, STR no-PORT group, and STR with PORT group) before (left points) and after (right points) inverse probability weighting.

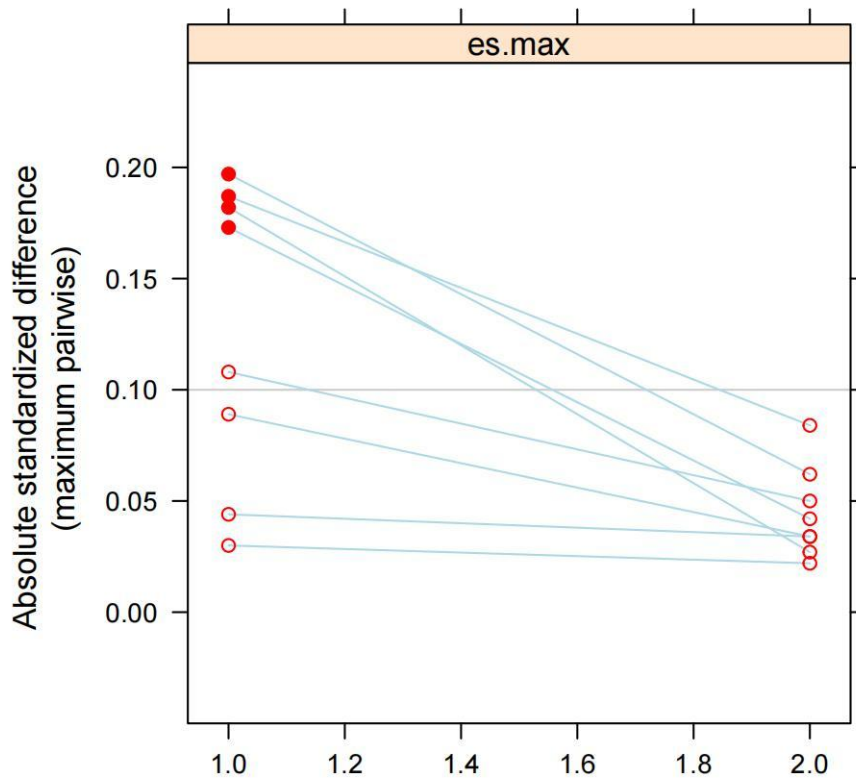

**Supplement Figure 2:** The absolute standardized mean difference values of variables before (left points) and after (right points) inverse probability weighting for subgroups, including patients with age < 60 years old (A) and with age  $\geq$  60 years old (B).

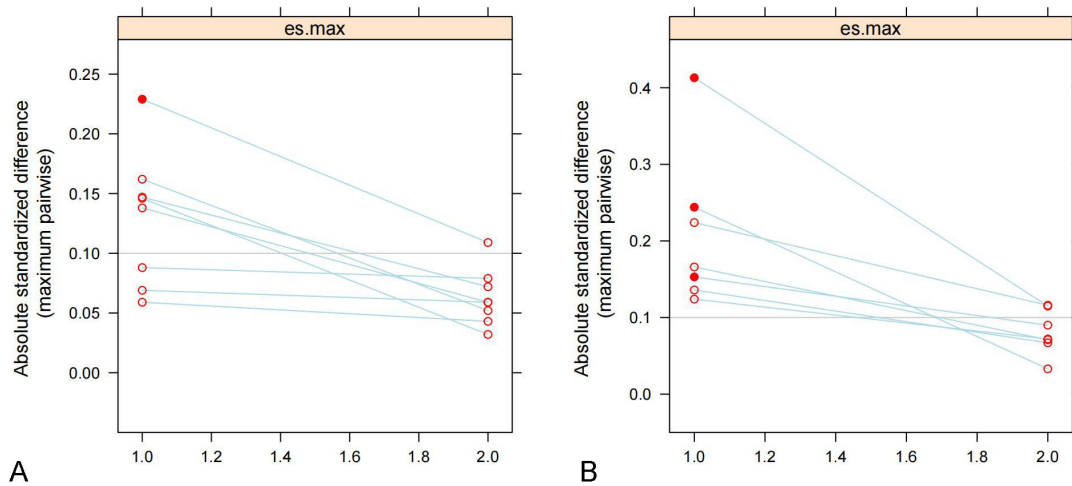

**Supplement Note 1:**

Since the SEER database does not record the “SEER cause-specific death classification” for patients with atypical meningioma, we defined atypical meningioma-specific death based on 3 different definitions.

Definition A: “COD to site recode” recorded as “in situ, benign or unknown behavior neoplasm.”

Definition B: “COD to site recode” recorded as “Brain and Other Nervous System.”

Definition C: “COD to site recode” recorded as “in situ, benign or unknown behavior neoplasm” or “Brain and Other Nervous System.”
